# Supplementary material for: Proinsulin‐specific T‐cell responses correlate with estimated c‐peptide and predict partial remission duration in type 1 diabetes
Source: PubMed Central journal article supplement (PMC8312239; doi:10.1002/cti2.1315), 2021-07-26
Supplement: CTI2-10-e1315-s001.pdf [file CTI2-10-e1315-s001.pdf]

**TITLE:** Proinsulin-specific t-cell responses correlate with estimated c-peptide and predict partial remission duration in type 1 diabetes

**RUNNING TITLE:** Proinsulin-specific T-cells as a T1D biomarker

**SUPPLEMENTARY FIGURES AND TABLES**

**Table 1. Islet antibody status of participants**

| Islet antibody                                 | Healthy controls<br>(16) | AB-negative FDR (9) | AB-positive FDR (17) |
|------------------------------------------------|--------------------------|---------------------|----------------------|
| Glutamic acid decarboxylase 65 (GAD 65)        | 0                        | 0                   | 12 (71%)             |
| Islet tyrosine phosphatase-like protein (IA-2) | 0                        | 0                   | 9 (53%)              |
| Microinsulin (miaa)                            | 0                        | 0                   | 15 (88%)             |
| Islet cell (ICA)                               | 0                        | 0                   | 12 (71%)             |
| Zinc transporter 8 (ZnT8)                      | 0                        | 0                   | 9 (53%)              |
| >1 islet antibody                              | 0                        | 0                   | 11 (64%)             |

**Supplementary Table 2. ROC, Receiver Operator Characteristic Curve analysis of T1D  $\leq$  3 months (n=22) and Healthy controls (n=12).** CDI, Cell Division Index is calculated from the mean of unstimulated proliferation in triplicate experiments.

| <b>Cell-Division Index</b> | <b>Sensitivity (%)</b> | <b>Specificity (%)</b> |
|----------------------------|------------------------|------------------------|
| <b>&gt; 2.0</b>            | 91%                    | 73%                    |
| <b>&gt; 2.6</b>            | 81%                    | 73%                    |
| <b>&gt; 2.9</b>            | 77%                    | 73%                    |
| <b>&gt; 3.0</b>            | 77%                    | 81%                    |
| <b>&gt; 3.5</b>            | 63%                    | 81%                    |

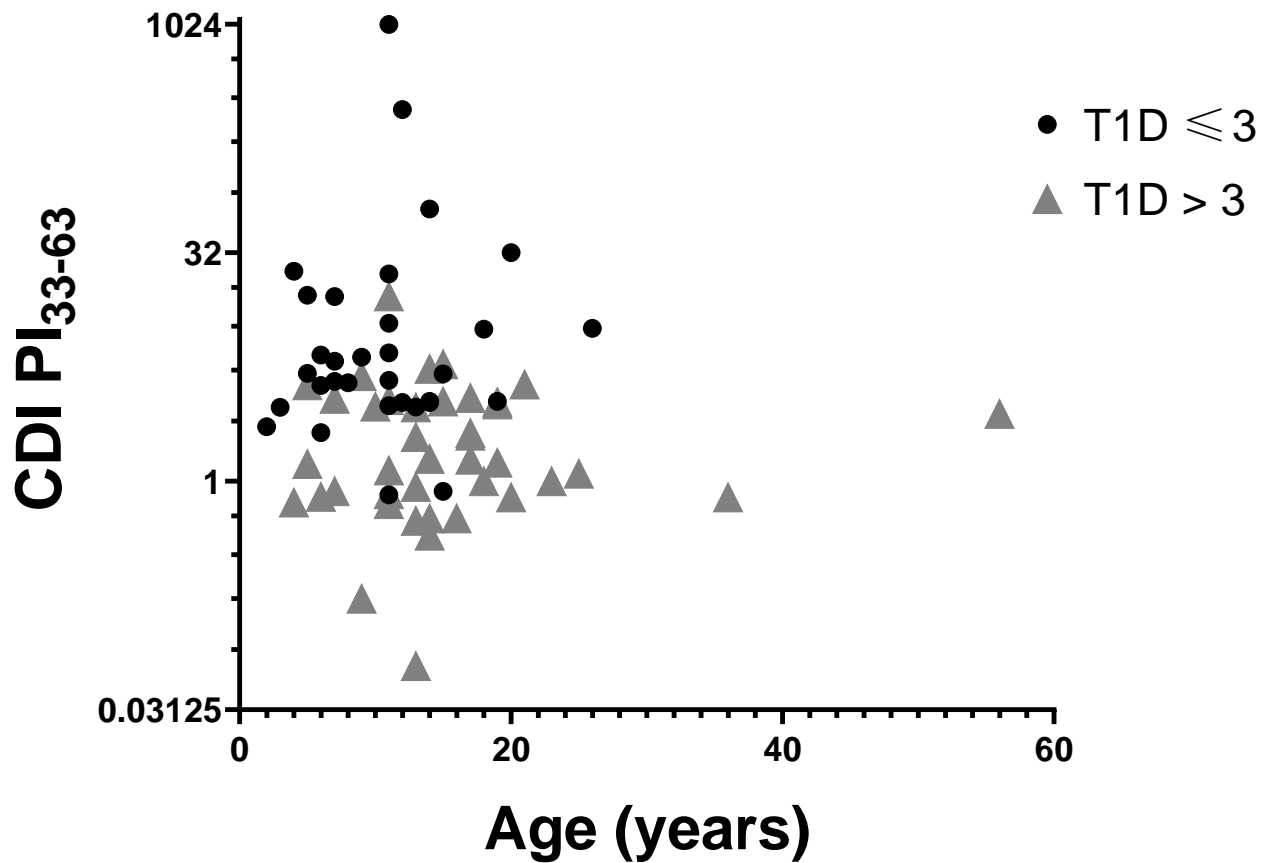

**Supplementary Figure 1. CD4<sup>+</sup> T-cell proliferative responses to proinsulin<sub>33-63</sub> relative to age for T1D subjects. ( $r_s = -0.18$ ,  $P = 0.11$ ).** CDI was calculated from the mean of unstimulated proliferation in triplicate experiments. T1D ≤ 3 months, n=32; T1D > 3 months, n = 40.

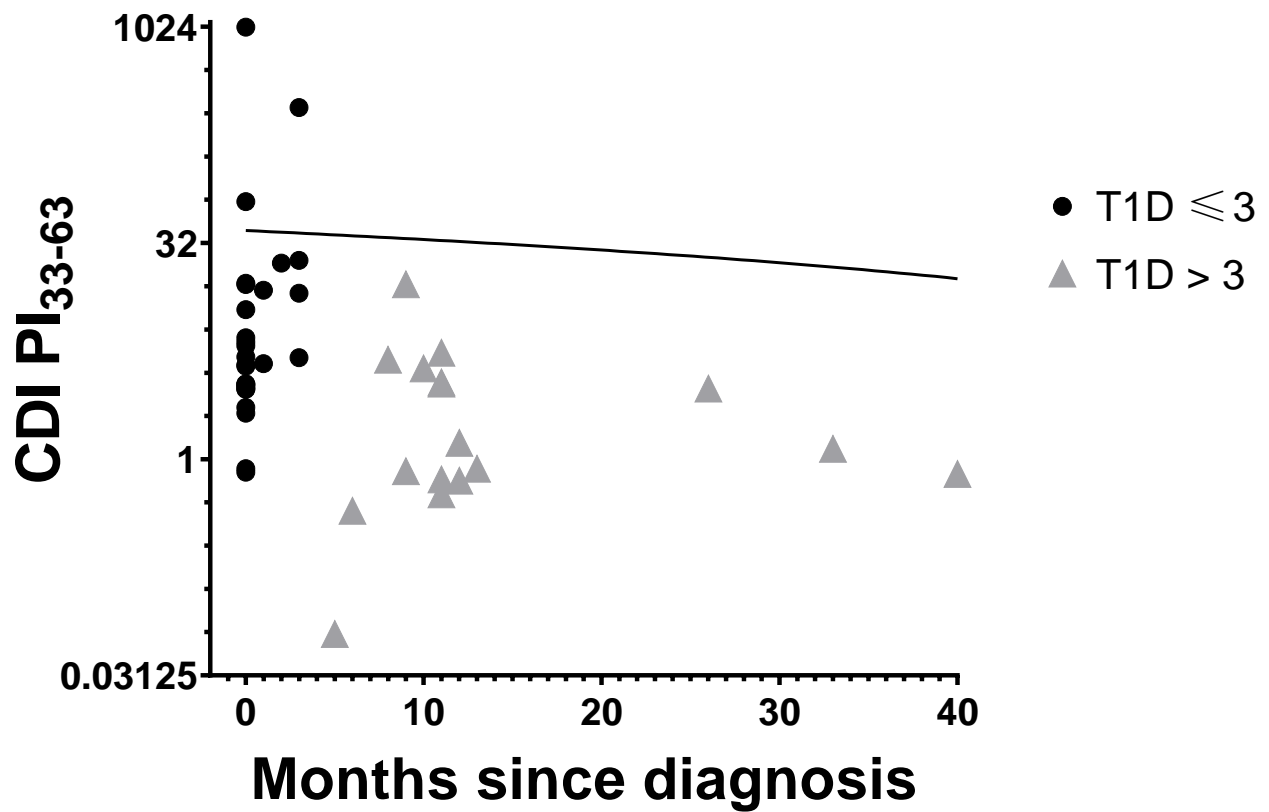

Supplementary Figure 2. CD4<sup>+</sup> T cell proliferative responses to proinsulin<sub>33-63</sub> relative to months since diagnosis for T1D subjects. ( $r_s = -0.47$ ,  $P = 0.0005$ ).

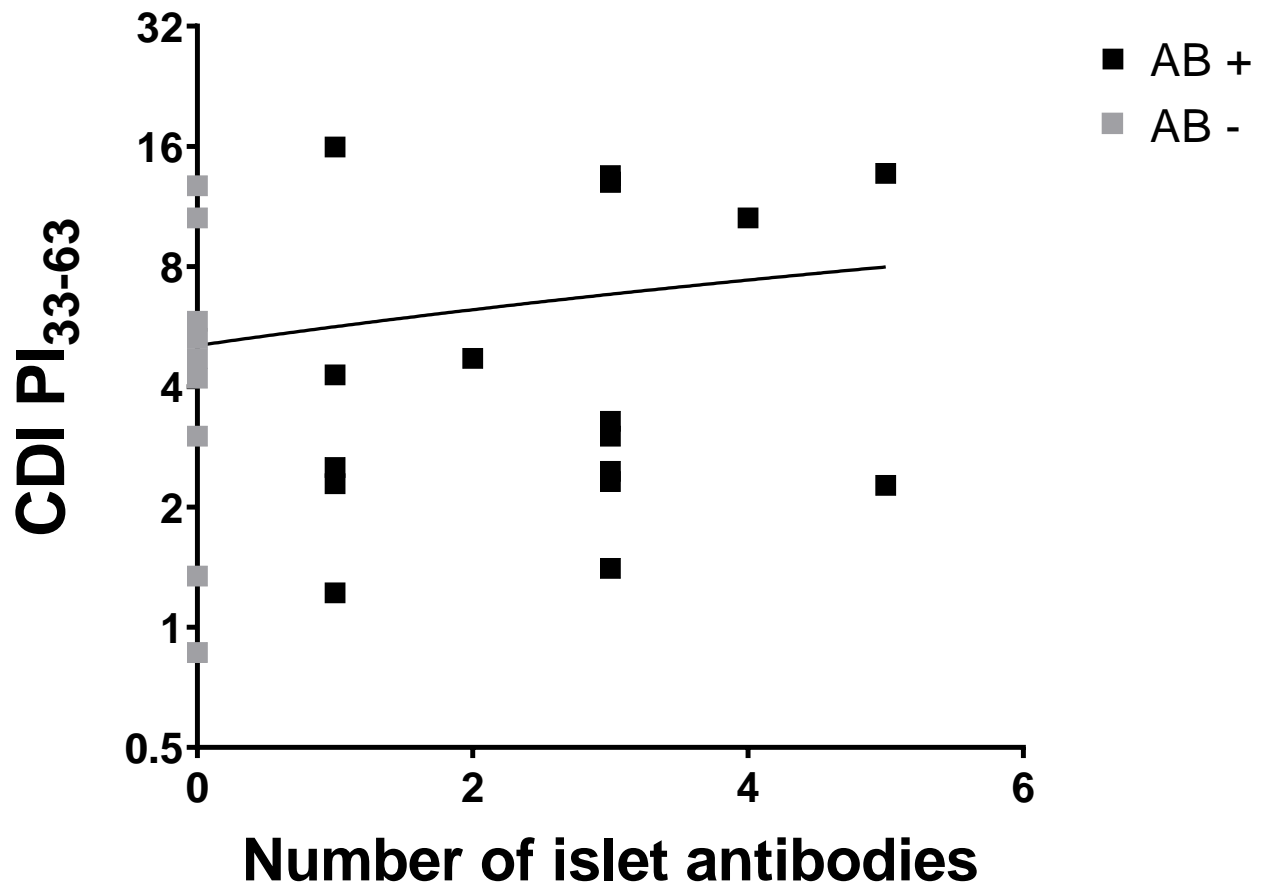

Supplementary Figure 3. CD4+ T cell proliferative responses to proinsulin<sub>33-63</sub> relative to number of islet antibodies for prediabetes subjects. ( $r^2=0.14$ ,  $P=0.58$ ).
